# Supplementary material
Source: HighWire-hosted journal article supplement (https://erj.ersjournals.com/content/54/6/1901023)
Supplement: inline-supplementary-material-1 [file inline-supplementary-material-1.pdf]

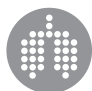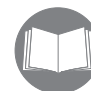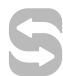

SHAREABLE PDF

# From ARIA guidelines to the digital transformation of health in rhinitis and asthma multimorbidity

Jean Bousquet<sup>1,2,3,4,5</sup>, Josep M. Anto<sup>6,7,8</sup>, Claus Bachert<sup>9</sup>,  
Sinthia Bosnic-Anticevich<sup>10</sup>, Marina Erhola<sup>11</sup>, Tari Haahtela<sup>12</sup>,  
Peter W. Hellings<sup>13,14</sup>, Piotr Kuna<sup>15</sup>, Oliver Pfaar<sup>16</sup>, Boleslaw Samolinski<sup>17</sup>,  
Holger J. Schünemann<sup>18</sup>, Aziz Sheikh<sup>19</sup>, Dana Wallace<sup>20</sup>, and the ARIA  
study group

**Affiliations:** <sup>1</sup>University Hospital Montpellier, Montpellier, France. <sup>2</sup>MACVIA-France, Fondation partenariale FMC VIA-LR, Montpellier, France. <sup>3</sup>INSERM U 1168, VIMA: Ageing and chronic diseases, Epidemiological and public health approaches, Villejuif, France. <sup>4</sup>Université Versailles St-Quentin-en-Yvelines, UMR-S 1168, Montigny le Bretonneux, France. <sup>5</sup>Charité, Universitätsmedizin Berlin, Humboldt-Universität zu Berlin, and Berlin Institute of Health, Comprehensive Allergy Center, Dept of Dermatology and Allergy, Berlin, Germany. <sup>6</sup>ISGlobAL, Centre for Research in Environmental Epidemiology (CREAL), Barcelona, Spain. <sup>7</sup>Universitat Pompeu Fabra (UPF), Barcelona, Spain. <sup>8</sup>CIBER Epidemiología y Salud Pública (CIBERESP), Barcelona, Spain. <sup>9</sup>Upper Airways Research Laboratory, ENT Dept, Ghent University Hospital, Ghent, Belgium. <sup>10</sup>Woolcock Institute of Medical Research, University of Sydney and Woolcock Emphysema Centre and Sydney Local Health District, Glebe, Australia. <sup>11</sup>National Institute for Health and Welfare, Helsinki, Finland. <sup>12</sup>Skin and Allergy Hospital, Helsinki University Hospital, and University of Helsinki, Helsinki, Finland. <sup>13</sup>Dept of Otorhinolaryngology, University Hospitals Leuven, Leuven, Belgium. <sup>14</sup>Academic Medical Center, University of Amsterdam, Amsterdam, The Netherlands. <sup>15</sup>Division of Internal Medicine, Asthma and Allergy, Barlicki University Hospital, Medical University of Lodz, Lodz, Poland. <sup>16</sup>Dept of Otorhinolaryngology, Head and Neck Surgery, Section of Rhinology and Allergy, University Hospital Marburg, Philipps-Universität Marburg, Marburg, Germany. <sup>17</sup>Dept of Prevention of Environmental Hazards and Allergology, Medical University of Warsaw, Warsaw, Poland. <sup>18</sup>Dept of Health Research Methods, Evidence, and Impact, Division of Immunology and Allergy, Dept of Medicine, McMaster University, Hamilton, ON, Canada. <sup>19</sup>The Usher Institute of Population Health Sciences and Informatics, The University of Edinburgh, Edinburgh, UK. <sup>20</sup>Nova Southeastern University, Fort Lauderdale, FL, USA.

**Correspondence:** Jean Bousquet, CHU Arnaud de Villeneuve, 371 Avenue du Doyen Gaston Giraud, 34295 Montpellier Cedex 5, France. E-mail: jean.bousquet@orange.fr

 @ERSpublications

**ARIA has evolved, with strong political commitment, from the first multimorbidity guideline in respiratory diseases to an exemplar for the future digital transformation of health and care for the management of patients with long-term conditions** <http://bit.ly/35fBlhN>

**Cite this article as:** Bousquet J, Anto JM, Bachert C, *et al.* From ARIA guidelines to the digital transformation of health in rhinitis and asthma multimorbidity. *Eur Respir J* 2019; 54: 1901023 [<https://doi.org/10.1183/13993003.01023-2019>].

This single-page version can be shared freely online.

In all societies, the disease burden and the healthcare costs for people with allergic and chronic respiratory diseases are increasing rapidly [1]. Most economies are struggling to deliver consistent high-quality healthcare. There is a need to support the transformation of the healthcare system for integrated care through leveraging developments in digital health [2]. The term “digital health” refers to advanced medical technologies, disruptive innovations and digital communication tools aiming to provide best healthcare practice [3].
